# Supplementary material for: Untargeted Metabolomics of Korean Fermented Brown Rice Using UHPLC Q-TOF MS/MS Reveal an Abundance of Potential Dietary Antioxidative and Stress-Reducing Compounds
Source: MDPI journal article supplement (doi:10.3390/antiox10040626), 2021-04-19
Supplement: s1 [file s1]

Table S1: GABA concentration detected by HPLC in Raw, different lactic acid bacteria fermented brown rice, germinated, and germination combined with fermentation (G+F)

| S.No | Sample                                                  | Area      | Concentration            | Retention time (Min.) |
|------|---------------------------------------------------------|-----------|--------------------------|-----------------------|
| 1    | Raw brown rice                                          | 20.65584  | 1.611±0.001 <sup>a</sup> | 12.695                |
| 2    | <i>P.pentosaceus</i> (FMC1)<br>Fermented brown rice     | 53.30829  | 6.24±0.057 <sup>d</sup>  | 12.712                |
| 3    | <i>L.fermentum</i> (FMF2)<br>Fermented brown rice       | 59.30758  | 7.03±0.055 <sup>e</sup>  | 12.71                 |
| 4    | <i>L.fermentum</i> (AKT2)<br>Fermented brown rice       | 192.989   | 19.07±0.069 <sup>h</sup> | 12.843                |
| 5    | <i>L.rhamnosus</i> (FMR2)<br>Fermented brown rice       | 83.40036  | 8.03±0.058 <sup>f</sup>  | 12.815                |
| 6    | <i>L.rhamnosus</i> (FMR1)<br>Fermented brown rice       | 46.32564  | 5.27±0.045 <sup>b</sup>  | 12.855                |
| 7    | <i>L.brevis</i> (FMB1)<br>Fermented brown rice          | 52.21344  | 6.19±0.064 <sup>d</sup>  | 12.856                |
| 8    | <i>L.brevis</i> ATCC (STANDARD)<br>Fermented brown rice | 53.56727  | 6.28±0.069 <sup>d</sup>  | 12.856                |
| 9    | <i>L.plantarum</i> (FMP1)<br>Fermented brown rice       | 50.30663  | 5.80±0.010 <sup>e</sup>  | 12.862                |
| 10   | <i>L.plantarum</i> (FMP2)<br>Fermented brown rice       | 51.5759   | 10.04±0.069 <sup>g</sup> | 12.866                |
| 11   | <i>L.reuterii</i> (AKT1)<br>Fermented brown rice        | 275.2176  | 27.03±0.055 <sup>j</sup> | 12.865                |
| 12   | Germinated brown rice                                   | 304.6879  | 34.40±0.026 <sup>k</sup> | 12.508                |
| 13   | G+F ( <i>L.reuterii</i> ) brown rice                    | 220.83539 | 22.91±0.028 <sup>i</sup> | 12.509                |

All values are expressed as the mean ± SD of triplicate experiments. The samples concentration used was 1mg/ml and a-k superscripts with different letters indicate a significant difference while sample superscript letters indicate no significant difference (Tukey and Duncan test  $p \leq 0.05$ ) DW, dry weight sample.

Table S2: Amino acids detected in different processed brown rice samples (raw, germinated, fermented (*L.reuterii* AKT1), and germinated+ fermented (*L.reuterii* AKT1).

| S.No | Sample Name | Retention time (Min) | Peak Area                  | Adduct/ Charge     | Precursor mass | Found at mass | Formula finder result                                        | Amino acid              |
|------|-------------|----------------------|----------------------------|--------------------|----------------|---------------|--------------------------------------------------------------|-------------------------|
| 1    | Raw         | 1                    | 1.92E+03±0.2 <sup>a</sup>  | [M+H] <sup>+</sup> | 156.077        | 156.077       | C <sub>6</sub> H <sub>9</sub> N <sub>3</sub> O <sub>2</sub>  | Histidine               |
|      | Germ        | 1.01                 | 1.11E+05±0.36 <sup>b</sup> | [M+H] <sup>+</sup> | 156.077        | 156.0772      |                                                              |                         |
|      | Ferm        | 1                    | 6.60E+05±0.76 <sup>c</sup> | [M+H] <sup>+</sup> | 156.077        | 156.077       |                                                              |                         |
|      | G+F         | 1                    | 7.21E+05±0.55 <sup>d</sup> | [M+H] <sup>+</sup> | 156.077        | 156.077       |                                                              |                         |
| 2    | Raw         | ND                   | ND                         | [M-H] <sup>-</sup> | ND             | ND            | C <sub>6</sub> H <sub>14</sub> N <sub>2</sub> O <sub>2</sub> | Lysine                  |
|      | Germ        | 0.97                 | 4.59E+03±0.52 <sup>a</sup> | [M-H] <sup>-</sup> | 145.099        | 145.0986      |                                                              |                         |
|      | Ferm        | 1.02                 | 1.64E+06±0.28 <sup>c</sup> | [M-H] <sup>-</sup> | 145.099        | 145.0984      |                                                              |                         |
|      | G+F         | 1                    | 9.86E+05±0.50 <sup>b</sup> | [M-H] <sup>-</sup> | 145.099        | 145.0983      |                                                              |                         |
| 3    | Raw         | ND                   | ND                         | [M+H] <sup>+</sup> | ND             | ND            | C <sub>5</sub> H <sub>11</sub> NO <sub>3</sub> S             | Methionine              |
|      | Germ        | 1.17                 | 7.04E+04±0.55 <sup>a</sup> | [M+H] <sup>+</sup> | 166.053        | 166.0535      |                                                              |                         |
|      | Ferm        | 1.18                 | 2.49E+05±0.52 <sup>c</sup> | [M+H] <sup>+</sup> | 166.053        | 166.0538      |                                                              |                         |
|      | G+F         | 1.17                 | 2.20E+05±0.50 <sup>b</sup> | [M+H] <sup>+</sup> | 166.053        | 166.0538      |                                                              |                         |
| 4    | Raw         | 1.17                 | 2.89E+02±0.76 <sup>a</sup> | [M-H] <sup>-</sup> | 146.047        | 146.0457      | C <sub>5</sub> H <sub>9</sub> NO <sub>4</sub>                | Glutamic Acid           |
|      | Germ        | 1.49                 | 2.15E+03±0.51 <sup>b</sup> | [M-H] <sup>-</sup> | 146.047        | 146.0457      |                                                              |                         |
|      | Ferm        | 1.49                 | 1.32E+06±0.55 <sup>d</sup> | [M-H] <sup>-</sup> | 146.047        | 146.046       |                                                              |                         |
|      | G+F         | 1.5                  | 9.27E+05±0.55 <sup>c</sup> | [M-H] <sup>-</sup> | 146.047        | 146.0459      |                                                              |                         |
| 5    | Raw         | ND                   | ND                         | [M+H] <sup>+</sup> | ND             | ND            | C <sub>4</sub> H <sub>9</sub> NO <sub>2</sub>                | Gamma-Aminobutyric Acid |
|      | Germ        | 1.1                  | 7.46E+05±1.00 <sup>c</sup> | [M+H] <sup>+</sup> | 104.071        | 104.0705      |                                                              |                         |
|      | Ferm        | 1.16                 | 7.10E+05±0.55 <sup>b</sup> | [M-H] <sup>-</sup> | 102.057        | 102.0565      |                                                              |                         |
|      | G+F         | 1.18                 | 2.76E+04±0.52 <sup>a</sup> | [M-H] <sup>-</sup> | 102.057        | 102.0563      |                                                              |                         |
| 6    | Raw         | ND                   | ND                         | [M+H] <sup>+</sup> | ND             | ND            | C <sub>6</sub> H <sub>14</sub> N <sub>4</sub> O <sub>2</sub> | Arginine                |
|      | Germ        | 1.02                 | 4.64E+06±0.55 <sup>b</sup> | [M+H] <sup>+</sup> | 175.118        | 175.1184      |                                                              |                         |
|      | Ferm        | 1.11                 | 5.99E+06±0.5 <sup>c</sup>  | [M+H] <sup>+</sup> | 175.118        | 175.1182      |                                                              |                         |
|      | G+F         | 1.33                 | 5.92E+04±0.50 <sup>a</sup> | [M+H] <sup>+</sup> | 175.118        | 175.1182      |                                                              |                         |
| 7    | Raw         | ND                   | ND                         | [M-H] <sup>-</sup> | ND             | ND            | C <sub>5</sub> H <sub>11</sub> NO <sub>2</sub>               | Valine                  |
|      | Germ        | ND                   | ND                         | [M-H] <sup>-</sup> | ND             | ND            |                                                              |                         |
|      | Ferm        | 1.47                 | 9.27E+05±0.51 <sup>b</sup> | [M-H] <sup>-</sup> | 116.073        | 116.0719      |                                                              |                         |
|      | G+F         | 1.48                 | 4.60E+05±0.50 <sup>a</sup> | [M-H] <sup>-</sup> | 116.073        | 116.0716      |                                                              |                         |
| 8    | Raw         | 1.14                 | 1.19E+03±0.36 <sup>a</sup> | [M-H] <sup>-</sup> | 132.031        | 132.0307      | C <sub>4</sub> H <sub>7</sub> NO <sub>4</sub>                | Aspartic acid           |
|      | Germ        | ND                   | ND                         | [M-H] <sup>-</sup> | ND             | ND            |                                                              |                         |
|      | Ferm        | 1.13                 | 5.26E+05±0.46 <sup>c</sup> | [M-H] <sup>-</sup> | 132.031        | 132.0302      |                                                              |                         |
|      | G+F         | 1.13                 | 2.99E+05±0.50 <sup>b</sup> | [M-H] <sup>-</sup> | 132.031        | 132.0303      |                                                              |                         |

|    |      |      |                            |                    |         |          |                                                               |               |
|----|------|------|----------------------------|--------------------|---------|----------|---------------------------------------------------------------|---------------|
| 9  | Raw  | ND   | ND                         | [M+H] <sup>+</sup> | ND      | ND       | C <sub>9</sub> H <sub>11</sub> NO <sub>2</sub>                | Phenylalanine |
|    | Germ | 4    | 1.86E+05±1.0 <sup>a</sup>  | [M+H] <sup>+</sup> | 166.086 | 166.086  |                                                               |               |
|    | Ferm | 4.03 | 1.97E+06±0.51 <sup>b</sup> | [M+H] <sup>+</sup> | 166.086 | 166.0865 |                                                               |               |
|    | G+F  | 4    | 3.44E+06±0.52 <sup>c</sup> | [M+H] <sup>+</sup> | 166.086 | 166.0858 |                                                               |               |
| 10 | Raw  | ND   | ND                         | [M-H] <sup>-</sup> | ND      | ND       | C <sub>5</sub> H <sub>12</sub> N <sub>2</sub> O <sub>2</sub>  | Ornithine     |
|    | Germ | 0.99 | 3.19E+03±0.51 <sup>a</sup> | [M-H] <sup>-</sup> | 131.084 | 131.0829 |                                                               |               |
|    | Ferm | 1.02 | 6.72E+05±0.55 <sup>c</sup> | [M-H] <sup>-</sup> | 131.084 | 131.0828 |                                                               |               |
|    | G+F  | 1    | 4.72E+05±0.50 <sup>b</sup> | [M-H] <sup>-</sup> | 131.084 | 131.0827 |                                                               |               |
| 11 | Raw  | 1.12 | 3.31E+02±0.15 <sup>a</sup> | [M-H] <sup>-</sup> | 104.036 | 104.0353 | C <sub>3</sub> H <sub>7</sub> NO <sub>3</sub>                 | Serine        |
|    | Germ | 1.11 | 3.52E+03±0.51 <sup>b</sup> | [M-H] <sup>-</sup> | 104.036 | 104.0356 |                                                               |               |
|    | Ferm | 1.11 | 6.33E+04±0.55 <sup>d</sup> | [M-H] <sup>-</sup> | 104.036 | 104.0354 |                                                               |               |
|    | G+F  | 1.11 | 3.94E+04±0.50 <sup>c</sup> | [M-H] <sup>-</sup> | 104.036 | 104.0355 |                                                               |               |
| 12 | Raw  | ND   | ND                         | [M-H] <sup>-</sup> | ND      | ND       | C <sub>6</sub> H <sub>13</sub> NO <sub>2</sub>                | Leucine       |
|    | Germ | 2.46 | 3.57E+03±0.60 <sup>a</sup> | [M-H] <sup>-</sup> | 130.088 | 130.0875 |                                                               |               |
|    | Ferm | 2.43 | 6.31E+06±0.55 <sup>c</sup> | [M-H] <sup>-</sup> | 130.088 | 130.0874 |                                                               |               |
|    | G+F  | 2.45 | 2.67E+06±0.51 <sup>b</sup> | [M-H] <sup>-</sup> | 130.088 | 130.0874 |                                                               |               |
| 13 | Raw  | ND   | ND                         | [M-H] <sup>-</sup> | ND      | ND       | C <sub>5</sub> H <sub>10</sub> N <sub>2</sub> O <sub>3</sub>  | Glutamine     |
|    | Germ | 1.12 | 5.92E+03±0.64 <sup>a</sup> | [M-H] <sup>-</sup> | 145.063 | 145.0619 |                                                               |               |
|    | Ferm | 1.12 | 6.32E+03±0.55 <sup>b</sup> | [M-H] <sup>-</sup> | 145.063 | 145.063  |                                                               |               |
|    | G+F  | 1.12 | 1.47E+05±0.52 <sup>c</sup> | [M-H] <sup>-</sup> | 145.063 | 145.062  |                                                               |               |
| 14 | Raw  | ND   | ND                         | [M-H] <sup>-</sup> | ND      | ND       | C <sub>9</sub> H <sub>11</sub> NO <sub>3</sub>                | Tyrosine      |
|    | Germ | 2.07 | 9.70E+03±0.60 <sup>a</sup> | [M-H] <sup>-</sup> | 180.068 | 180.0672 |                                                               |               |
|    | Ferm | 1.91 | 3.19E+04±0.55 <sup>c</sup> | [M-H] <sup>-</sup> | 180.068 | 180.0669 |                                                               |               |
|    | G+F  | 1.95 | 3.02E+04±0.50 <sup>b</sup> | [M-H] <sup>-</sup> | 180.068 | 180.0668 |                                                               |               |
| 15 | Raw  | ND   | ND                         | [M-H] <sup>-</sup> | ND      | ND       | C <sub>4</sub> H <sub>9</sub> NO <sub>3</sub>                 | Threonine     |
|    | Germ | ND   | ND                         | [M-H] <sup>-</sup> | ND      | ND       |                                                               |               |
|    | Ferm | 1.11 | 1.10E+04±0.55 <sup>a</sup> | [M-H] <sup>-</sup> | 118.052 | 118.0513 |                                                               |               |
|    | G+F  | 1.95 | 3.02E+04±0.50 <sup>b</sup> | [M-H] <sup>-</sup> | 118.052 | 180.0668 |                                                               |               |
| 16 | Raw  | ND   | ND                         | [M-H] <sup>-</sup> | ND      | ND       | C <sub>4</sub> H <sub>8</sub> N <sub>2</sub> O <sub>3</sub>   | Asparagine    |
|    | Germ | ND   | ND                         | [M-H] <sup>-</sup> | ND      | ND       |                                                               |               |
|    | Ferm | 1.11 | 2.97E+05±0.55 <sup>b</sup> | [M-H] <sup>-</sup> | 131.047 | 131.0461 |                                                               |               |
|    | G+F  | 1.11 | 1.94E+05±0.51 <sup>a</sup> | [M-H] <sup>-</sup> | 131.047 | 131.0462 |                                                               |               |
| 17 | Raw  | ND   | ND                         | [M-H] <sup>-</sup> | ND      | ND       | C <sub>11</sub> H <sub>12</sub> N <sub>2</sub> O <sub>2</sub> | Tryptophan    |
|    | Germ | ND   | ND                         | [M-H] <sup>-</sup> | ND      | ND       |                                                               |               |
|    | Ferm | 7.62 | 2.84E+06±0.55 <sup>b</sup> | [M-H] <sup>-</sup> | 203.084 | 203.0829 |                                                               |               |
|    | G+F  | 7.65 | 1.20E+06±0.52 <sup>a</sup> | [M-H] <sup>-</sup> | 203.084 | 203.0828 |                                                               |               |

|    |      |      |                            |                    |        |          |                                               |         |
|----|------|------|----------------------------|--------------------|--------|----------|-----------------------------------------------|---------|
| 18 | Raw  | ND   | ND                         | [M+H] <sup>+</sup> | ND     | ND       | C <sub>5</sub> H <sub>9</sub> NO <sub>2</sub> | Proline |
|    | Germ | 1.15 | 1.01E+06±0.80 <sup>b</sup> | [M+H] <sup>+</sup> | 130.05 | 130.0499 |                                               |         |
|    | Ferm | 1.17 | 8.81E+06±0.55 <sup>c</sup> | [M+H] <sup>+</sup> | 130.05 | 130.0499 |                                               |         |
|    | G+F  | 1.15 | 5.60E+05±0.55 <sup>a</sup> | [M+H] <sup>+</sup> | 130.05 | 130.0501 |                                               |         |

Results are expressed as mean ± SD of triplicate analyses. Different alphabetical letters in each column represent statistically significant differences (Tukey and Duncan test  $p \leq 0.05$ ) DW, dry weight sample

Table S3: Phenolic compounds detected in different processed brown rice samples (raw, germinated, fermented (*L.reuterii* AKT1), and germinated+ fermented (*L.reuterii* AKT1).

| S.No | Sample Name | Retention time | Peak Area                  | Adduct/Charge      | Precursor mass | Found at mass | Formula finder result                                        | Phenolic compound |
|------|-------------|----------------|----------------------------|--------------------|----------------|---------------|--------------------------------------------------------------|-------------------|
| 1    | Raw         | 45.5           | 8.87E+04±0.52 <sup>a</sup> | [M+H] <sup>+</sup> | 353.268        | 353.2847      | C <sub>25</sub> H <sub>36</sub> O                            | Beta-carotenol    |
|      | Germ        | Nd             | Nd                         | [M+H] <sup>+</sup> | Nd             | Nd            |                                                              |                   |
|      | Ferm        | 45.49          | 9.18E+04±0.5 <sup>b</sup>  | [M+H] <sup>+</sup> | 353.268        | 353.2848      |                                                              |                   |
|      | G+F         | Nd             | Nd                         | [M+H] <sup>+</sup> | Nd             | Nd            |                                                              |                   |
| 2    | Raw         | Nd             | Nd                         | [M+H] <sup>+</sup> | Nd             | Nd            | C <sub>10</sub> H <sub>12</sub> O <sub>2</sub>               | Eugenol           |
|      | Germ        | 20.85          | 2.58E+04±0.51 <sup>a</sup> | [M+H] <sup>+</sup> | 179.107        | 179.1067      |                                                              |                   |
|      | Ferm        | 20.85          | 2.12E+05±0.50 <sup>c</sup> | [M+H] <sup>+</sup> | 179.107        | 179.1069      |                                                              |                   |
|      | G+F         | 20.83          | 1.11E+05±0.50 <sup>b</sup> | [M+H] <sup>+</sup> | 179.107        | 179.1068      |                                                              |                   |
| 3    | Raw         | 33.8           | 2.10E+06±1.00 <sup>a</sup> | [M-H] <sup>-</sup> | 293.177        | 293.1761      | C <sub>17</sub> H <sub>26</sub> O <sub>4</sub>               | 6-Gingerol        |
|      | Germ        | 33.79          | 2.10E+06±0.25 <sup>c</sup> | [M-H] <sup>-</sup> | 293.177        | 293.176       |                                                              |                   |
|      | Ferm        | 33.82          | 2.15E+06±0.51 <sup>d</sup> | [M-H] <sup>-</sup> | 293.177        | 293.1762      |                                                              |                   |
|      | G+F         | 33.81          | 2.07E+06±1.0 <sup>b</sup>  | [M-H] <sup>-</sup> | 293.177        | 293.176       |                                                              |                   |
| 4    | Raw         | Nd             | Nd                         | [M-H] <sup>-</sup> | Nd             | Nd            | C <sub>15</sub> H <sub>10</sub> O <sub>4</sub>               | Chrysin           |
|      | Germ        | Nd             | Nd                         | [M-H] <sup>-</sup> | Nd             | Nd            |                                                              |                   |
|      | Ferm        | 14.78          | 4.09E+05±0.50 <sup>a</sup> | [M-H] <sup>-</sup> | 253.052        | 253.0509      |                                                              |                   |
|      | G+F         | Nd             | Nd                         | [M-H] <sup>-</sup> | Nd             | Nd            |                                                              |                   |
| 5    | Raw         | Nd             | Nd                         | [M-H] <sup>-</sup> | Nd             | Nd            | C <sub>16</sub> H <sub>8</sub> N <sub>2</sub> O <sub>5</sub> | Apigenin          |
|      | Germ        | Nd             | Nd                         | [M-H] <sup>-</sup> | Nd             | Nd            |                                                              |                   |
|      | Ferm        | 14.78          | 4.34E+05±0.5 <sup>a</sup>  | [M-H] <sup>-</sup> | 269.047        | 269.0456      |                                                              |                   |
|      | G+F         | Nd             | Nd                         | [M-H] <sup>-</sup> | Nd             | Nd            |                                                              |                   |
| 6    | Raw         | Nd             | Nd                         | [M+H] <sup>+</sup> | Nd             | Nd            | C <sub>9</sub> H <sub>6</sub> O <sub>2</sub>                 | Coumarin          |
|      | Germ        | 1.89           | 2.20E+05±0.50 <sup>b</sup> | [M+H] <sup>+</sup> | 147.044        | 147.0444      |                                                              |                   |
|      | Ferm        | 1.87           | 1.24E+05±0.51 <sup>a</sup> | [M+H] <sup>+</sup> | 147.044        | 147.0447      |                                                              |                   |
|      | G+F         | 1.92           | 2.94E+05±0.51 <sup>c</sup> | [M+H] <sup>+</sup> | 147.044        | 147.0444      |                                                              |                   |
| 7    | Raw         | 12.31          | ND                         | [M+H] <sup>+</sup> | 305.071        | 305.067       | C <sub>15</sub> H <sub>14</sub> O <sub>7</sub>               | Epigallocatechin  |
|      | Germ        | 12.3           | 4.51E+04±0.51 <sup>a</sup> | [M+H] <sup>+</sup> | 305.071        | 305.067       |                                                              |                   |
|      | Ferm        | 12.29          | 1.44E+06±1.0 <sup>c</sup>  | [M+H] <sup>+</sup> | 305.071        | 305.067       |                                                              |                   |
|      | G+F         | 12.26          | 5.98E+05±0.60 <sup>b</sup> | [M+H] <sup>+</sup> | 305.071        | 305.067       |                                                              |                   |

|    |      |       |                            |                    |         |          |                                                |                                |
|----|------|-------|----------------------------|--------------------|---------|----------|------------------------------------------------|--------------------------------|
| 8  | Raw  | Nd    | Nd                         | [M+H] <sup>+</sup> | Nd      | Nd       | C <sub>7</sub> H <sub>19</sub> N <sub>3</sub>  | Spermidine                     |
|    | Germ | 0.94  | 5.55E+04±0.51 <sup>a</sup> | [M+H] <sup>+</sup> | 188.176 | 188.1761 |                                                |                                |
|    | Ferm | 0.96  | 1.33E+06±0.52 <sup>c</sup> | [M+H] <sup>+</sup> | 188.176 | 188.1761 |                                                |                                |
|    | G+F  | 0.95  | 1.96E+05±0.55 <sup>b</sup> | [M+H] <sup>+</sup> | 188.176 | 188.1761 |                                                |                                |
| 9  | Raw  | 38.06 | 4.13E+05±0.50 <sup>a</sup> | [M-H] <sup>-</sup> | 277.182 | 277.1812 | C <sub>17</sub> H <sub>26</sub> O <sub>3</sub> | 6-Paradol                      |
|    | Germ | 38.04 | 4.25E+05±0.50 <sup>b</sup> | [M-H] <sup>-</sup> | 277.182 | 277.1813 |                                                |                                |
|    | Ferm | 38.08 | 4.38E+05±0.51 <sup>d</sup> | [M-H] <sup>-</sup> | 277.182 | 277.1811 |                                                |                                |
|    | G+F  | 38.07 | 4.36E+05±0.52 <sup>c</sup> | [M-H] <sup>-</sup> | 277.182 | 277.1811 |                                                |                                |
| 10 | Raw  | Nd    | Nd                         | [M-H] <sup>-</sup> | Nd      | Nd       | C <sub>9</sub> H <sub>8</sub> O <sub>2</sub>   | Cinnamic acid                  |
|    | Germ | Nd    | Nd                         | [M-H] <sup>-</sup> | Nd      | Nd       |                                                |                                |
|    | Ferm | 4     | 1.10E+06±1.02 <sup>b</sup> | [M-H] <sup>-</sup> | 147.046 | 147.0452 |                                                |                                |
|    | G+F  | 4.01  | 4.10E+05±0.55 <sup>a</sup> | [M-H] <sup>-</sup> | 147.046 | 147.0453 |                                                |                                |
| 11 | Raw  | Nd    | Nd                         | [M+H] <sup>+</sup> | Nd      | Nd       | C <sub>9</sub> H <sub>8</sub> O <sub>3</sub>   | p-Coumaric acid                |
|    | Germ | Nd    | Nd                         | [M+H] <sup>+</sup> | Nd      | Nd       |                                                |                                |
|    | Ferm | 1.89  | 1.35E+06±0.50 <sup>a</sup> | [M+H] <sup>+</sup> | 182.081 | 182.0811 |                                                |                                |
|    | G+F  | Nd    | Nd                         | [M+H] <sup>+</sup> | Nd      | Nd       |                                                |                                |
| 12 | Raw  | Nd    | Nd                         | [M-H] <sup>-</sup> | Nd      | Nd       | C <sub>9</sub> H <sub>10</sub> O <sub>3</sub>  | Methoxyphenylacetic acid       |
|    | Germ | Nd    | Nd                         | [M-H] <sup>-</sup> | Nd      | Nd       |                                                |                                |
|    | Ferm | 15.28 | 1.27E+07±1.0 <sup>b</sup>  | [M-H] <sup>-</sup> | 165.057 | 165.0556 |                                                |                                |
|    | G+F  | 15.28 | 4.04E+06±1.0 <sup>a</sup>  | [M-H] <sup>-</sup> | 165.057 | 165.0557 |                                                |                                |
| 13 | Raw  | Nd    | Nd                         | [M-H] <sup>-</sup> | Nd      | Nd       | C <sub>7</sub> H <sub>6</sub> O <sub>3</sub>   | Sesamol/ 2-Hydroxybenzoic acid |
|    | Germ | Nd    | Nd                         | [M-H] <sup>-</sup> | Nd      | Nd       |                                                |                                |
|    | Ferm | 19.63 | 1.35E+05±0.51 <sup>a</sup> | [M-H] <sup>-</sup> | 137.025 | 137.025  |                                                |                                |
|    | G+F  | Nd    | Nd                         | [M-H] <sup>-</sup> | Nd      | Nd       |                                                |                                |
| 14 | Raw  | Nd    | Nd                         | [M-H] <sup>-</sup> | Nd      | Nd       | C <sub>8</sub> H <sub>8</sub> O                | Vanillic acid/ Acetophenone    |
|    | Germ | Nd    | Nd                         | [M-H] <sup>-</sup> | Nd      | Nd       |                                                |                                |
|    | Ferm | 15.28 | 5.64E+06±1.0 <sup>b</sup>  | [M-H] <sup>-</sup> | 119.051 | 119.0504 |                                                |                                |
|    | G+F  | 15.29 | 5.01E+06±0.5 <sup>a</sup>  | [M-H] <sup>-</sup> | 119.051 | 119.0503 |                                                |                                |

Results are expressed as mean ± SD of triplicate analyses. Different alphabetical letters in each column represent statistically significant differences (Tukey and Duncan test  $p \leq 0.05$ ) DW, dry weight sample

Table S4: Organic acids detected in different processed brown rice samples (raw, germinated, fermented (*L.reuterii* AKT1), and germinated+fermented (*L.reuterii* AKT1).

| S.No | Sample Name | Retention time | Peak Area                  | Adduct/Charge      | Precursor mass | Found at mass | Formula finder result                                        | Organic acid                               |
|------|-------------|----------------|----------------------------|--------------------|----------------|---------------|--------------------------------------------------------------|--------------------------------------------|
| 1    | Raw         | 31.12          | 2.80E+05±0.50 <sup>a</sup> | [M+H] <sup>+</sup> | 445.12         | 445.1193      | C <sub>4</sub> H <sub>6</sub> O <sub>5</sub>                 | Malic acid                                 |
|      | Germ        | 32.04          | 1.21E+06±1.0 <sup>b</sup>  | [M+H] <sup>+</sup> | 445.12         | 445.1194      |                                                              |                                            |
|      | Ferm        | 52.87          | 7.40E+06±1.0 <sup>d</sup>  | [M+H] <sup>+</sup> | 445.12         | 445.1193      |                                                              |                                            |
|      | G+F         | 52.83          | 3.45E+06±0.60 <sup>c</sup> | [M+H] <sup>+</sup> | 445.12         | 445.1195      |                                                              |                                            |
| 2    | Raw         | 39.74          | 4.44E+05±1.0 <sup>a</sup>  | [M+H] <sup>+</sup> | 205.086        | 205.0864      | C <sub>12</sub> H <sub>12</sub> O <sub>3</sub>               | Anofinic acid                              |
|      | Germ        | ND             | ND                         | [M+H] <sup>+</sup> | ND             | ND            |                                                              |                                            |
|      | Ferm        | 39.76          | 7.02E+05±0.52 <sup>c</sup> | [M+H] <sup>+</sup> | 205.086        | 205.0865      |                                                              |                                            |
|      | G+F         | 39.74          | 5.84E+05±1.0 <sup>b</sup>  | [M+H] <sup>+</sup> | 205.086        | 205.0864      |                                                              |                                            |
| 3    | Raw         | ND             | ND                         | [M+H] <sup>+</sup> | ND             | ND            | C <sub>8</sub> H <sub>14</sub> O <sub>2</sub> S <sub>2</sub> | Lipoic acid                                |
|      | Germ        | 1              | 1.05E+05±0.55 <sup>b</sup> | [M+H] <sup>+</sup> | 207.051        | 207.0512      |                                                              |                                            |
|      | Ferm        | 1.01           | 2.15E+04±0.52 <sup>a</sup> | [M+H] <sup>+</sup> | 207.051        | 207.0504      |                                                              |                                            |
|      | G+F         | ND             | ND                         | [M+H] <sup>+</sup> | ND             | ND            |                                                              |                                            |
| 4    | Raw         | ND             | ND                         | [M+H] <sup>+</sup> | ND             | ND            | C <sub>5</sub> H <sub>6</sub> O <sub>4</sub>                 | Itaconic acid                              |
|      | Germ        | 1.18           | 1.27E+05±1.01 <sup>a</sup> | [M+H] <sup>+</sup> | 148.061        | 148.0606      |                                                              |                                            |
|      | Ferm        | 1.21           | 1.83E+06±1.0 <sup>c</sup>  | [M+H] <sup>+</sup> | 148.061        | 148.0608      |                                                              |                                            |
|      | G+F         | 1.16           | 7.14E+05±0.50 <sup>b</sup> | [M+H] <sup>+</sup> | 148.061        | 148.0608      |                                                              |                                            |
| 5    | Raw         | ND             | ND                         | [M+H] <sup>+</sup> | ND             | ND            | C <sub>9</sub> H <sub>8</sub> O <sub>3</sub>                 | 4-Hydroxycinnamic acid/<br>P-coumaric acid |
|      | Germ        | ND             | ND                         | [M+H] <sup>+</sup> | ND             | ND            |                                                              |                                            |
|      | Ferm        | 1.89           | 1.35E+06±1.0 <sup>a</sup>  | [M+H] <sup>+</sup> | 182.081        | 182.0811      |                                                              |                                            |
|      | G+F         | ND             | ND                         | [M+H] <sup>+</sup> | ND             | ND            |                                                              |                                            |
| 6    | Raw         | 1.2            | 1.28E+04±1.01 <sup>a</sup> | [M-H] <sup>-</sup> | 195.052        | 195.0513      | C <sub>6</sub> H <sub>12</sub> O <sub>7</sub>                | Gluconic acid                              |
|      | Germ        | 1.2            | 2.49E+05±1.0 <sup>b</sup>  | [M-H] <sup>-</sup> | 195.052        | 195.0511      |                                                              |                                            |
|      | Ferm        | 1.19           | 6.07E+05±0.51 <sup>d</sup> | [M-H] <sup>-</sup> | 195.052        | 195.0513      |                                                              |                                            |
|      | G+F         | 1.2            | 3.37E+05±0.64 <sup>c</sup> | [M-H] <sup>-</sup> | 195.052        | 195.051       |                                                              |                                            |
| 7    | Raw         | ND             | ND                         | [M-H] <sup>-</sup> | ND             | ND            | C <sub>3</sub> H <sub>4</sub> O <sub>4</sub>                 | Malonic acid                               |
|      | Germ        | 1.21           | 1.05E+03±0.50 <sup>a</sup> | [M-H] <sup>-</sup> | 103.005        | 103.0036      |                                                              |                                            |
|      | Ferm        | 1.23           | 1.33E+06±1.01 <sup>c</sup> | [M-H] <sup>-</sup> | 103.005        | 103.0038      |                                                              |                                            |
|      | G+F         | 1.23           | 9.74E+05±0.60 <sup>b</sup> | [M-H] <sup>-</sup> | 103.005        | 103.0038      |                                                              |                                            |
| 8    | Raw         | ND             | ND                         | [M-H] <sup>-</sup> | ND             | ND            | C <sub>5</sub> H <sub>10</sub> O <sub>6</sub>                | Arabinonic Acid                            |
|      | Germ        | ND             | ND                         | [M-H] <sup>-</sup> | ND             | ND            |                                                              |                                            |

|    |      |       |                            |        |         |          |                                                              |                                           |
|----|------|-------|----------------------------|--------|---------|----------|--------------------------------------------------------------|-------------------------------------------|
|    | Ferm | 1.21  | 7.39E+05±0.54 <sup>b</sup> | [M-H]- | 165.041 | 165.0409 |                                                              |                                           |
|    | G+F  | 1.21  | 6.24E+05±1.0 <sup>a</sup>  | [M-H]- | 165.041 | 165.0406 |                                                              |                                           |
| 9  | Raw  | ND    | ND                         | [M-H]- | ND      | ND       | C <sub>4</sub> H <sub>6</sub> O <sub>4</sub>                 | Succinic acid                             |
|    | Germ | 2.23  | 3.98E+03±0.64 <sup>a</sup> | [M-H]- | 117.02  | 117.0199 |                                                              |                                           |
|    | Ferm | 1.39  | 3.38E+05±1.0 <sup>c</sup>  | [M-H]- | 117.02  | 117.0195 |                                                              |                                           |
|    | G+F  | 2.22  | 1.38E+05±0.68 <sup>b</sup> | [M-H]- | 117.02  | 117.0194 |                                                              |                                           |
| 10 | Raw  | ND    | ND                         | [M-H]- | ND      | ND       | C <sub>9</sub> H <sub>17</sub> NO <sub>8</sub>               | Neuraminic acid                           |
|    | Germ | ND    | ND                         | [M-H]- | ND      | ND       |                                                              |                                           |
|    | Ferm | 1.13  | 2.15E+05±0.68 <sup>b</sup> | [M-H]- | 266.089 | 266.0882 |                                                              |                                           |
|    | G+F  | 1.15  | 7.14E+03±1.0 <sup>a</sup>  | [M-H]- | 266.089 | 266.0884 |                                                              |                                           |
| 11 | Raw  | ND    | ND                         | [M-H]- | ND      | ND       | C <sub>8</sub> H <sub>6</sub> O <sub>4</sub>                 | Isophthalic Acid                          |
|    | Germ | ND    | ND                         | [M-H]- | ND      | ND       |                                                              |                                           |
|    | Ferm | 1.76  | 7.24E+05±0.72 <sup>b</sup> | [M-H]- | 199.039 | 199.038  |                                                              |                                           |
|    | G+F  | 1.78  | 3.90E+05±0.80 <sup>a</sup> | [M-H]- | 199.039 | 199.036  |                                                              |                                           |
| 12 | Raw  | ND    | ND                         | [M+H]+ | ND      | ND       | C <sub>5</sub> H <sub>11</sub> N <sub>3</sub> O <sub>2</sub> | Butanoic acid<br>(Guanidinobutanoic acid) |
|    | Germ | 1.34  | 8.15E+03±1.0 <sup>a</sup>  | [M+H]+ | 146.092 | 146.0922 |                                                              |                                           |
|    | Ferm | 1.35  | 3.69E+05±0.64 <sup>c</sup> | [M+H]+ | 146.092 | 146.0923 |                                                              |                                           |
|    | G+F  | 1.34  | 2.01E+05±0.68 <sup>b</sup> | [M+H]+ | 146.092 | 146.0923 |                                                              |                                           |
| 13 | Raw  | ND    | ND                         | [M+H]+ | ND      | ND       | C <sub>12</sub> H <sub>21</sub> NO <sub>6</sub>              | glutaric acid (O-<br>Glutarylcarntine)    |
|    | Germ | 2.51  | 5.71E+04±0.50 <sup>a</sup> | [M+H]+ | 276.145 | 276.1445 |                                                              |                                           |
|    | Ferm | 2.53  | 3.51E+06±0.60 <sup>c</sup> | [M+H]+ | 276.145 | 276.1442 |                                                              |                                           |
|    | G+F  | 2.55  | 8.74E+05±0.81 <sup>b</sup> | [M+H]+ | 276.145 | 276.1448 |                                                              |                                           |
| 14 | Raw  | 2.2   | 1.78E+03±1.0 <sup>a</sup>  | [M-H]- | 154.975 | 154.9745 | C <sub>5</sub> H <sub>4</sub> N <sub>2</sub> S <sub>2</sub>  | Pyrazinoic acid                           |
|    | Germ | 31.53 | 5.18E+03±0.52 <sup>b</sup> | [M-H]- | 154.975 | 154.9743 |                                                              |                                           |
|    | Ferm | 47.13 | 3.89E+04±0.76 <sup>c</sup> | [M-H]- | 154.975 | 154.9745 |                                                              |                                           |
|    | G+F  | 47.13 | 4.62E+04±0.72 <sup>d</sup> | [M-H]- | 154.975 | 154.9745 |                                                              |                                           |
| 15 | Raw  | ND    | ND                         | [M+H]+ | ND      | ND       | C <sub>6</sub> H <sub>8</sub> O <sub>6</sub>                 | Ascorbic acid<br>(Vitamin C)              |
|    | Germ | ND    | ND                         | [M+H]+ | ND      | ND       |                                                              |                                           |
|    | Ferm | 1.02  | 4.95E+03±0.80 <sup>a</sup> | [M+H]+ | 209.009 | 209.0107 |                                                              |                                           |
|    | G+F  | ND    | ND                         | [M+H]+ | ND      | ND       |                                                              |                                           |
| 16 | Raw  | ND    | ND                         | [M+H]+ | ND      | ND       | C <sub>6</sub> H <sub>5</sub> NO <sub>2</sub>                | Nicotinic acid<br>(vitamin B3)            |
|    | Germ | 1.75  | 2.58E+05±0.95 <sup>b</sup> | [M+H]+ | 124.039 | 124.0395 |                                                              |                                           |
|    | Ferm | 1.78  | 4.95E+05±0.64 <sup>c</sup> | [M+H]+ | 124.039 | 124.0392 |                                                              |                                           |
|    | G+F  | 1.75  | 2.47E+04±0.80 <sup>a</sup> | [M+H]+ | 124.039 | 124.0396 |                                                              |                                           |



|    |      |       |                            |        |         |          |                                                |                     |
|----|------|-------|----------------------------|--------|---------|----------|------------------------------------------------|---------------------|
| 17 | Raw  | ND    | ND                         | [M-H]- | ND      | ND       | C <sub>4</sub> H <sub>8</sub> O <sub>3</sub>   | Hydroxybutyric acid |
|    | Germ | ND    | ND                         | [M-H]- | ND      | ND       |                                                |                     |
|    | Ferm | 3.04  | 7.10E+05±0.72 <sup>a</sup> | [M-H]- | 103.041 | 103.04   |                                                |                     |
|    | G+F  | ND    | ND                         | [M-H]- | ND      | ND       |                                                |                     |
| 18 | Raw  | ND    | ND                         | [M-H]- | ND      | ND       | C <sub>7</sub> H <sub>10</sub> O <sub>7</sub>  | Homocitric acid     |
|    | Germ | ND    | ND                         | [M-H]- | ND      | ND       |                                                |                     |
|    | Ferm | 1.03  | 2.18E+05±0.85 <sup>a</sup> | [M-H]- | 205.036 | 205.036  |                                                |                     |
|    | G+F  | ND    | ND                         | [M-H]- | ND      | ND       |                                                |                     |
| 19 | Raw  | ND    | ND                         | [M-H]- | ND      | ND       | C <sub>18</sub> H <sub>32</sub> O <sub>5</sub> | Malyngic acid       |
|    | Germ | ND    | ND                         | [M-H]- | ND      | ND       |                                                |                     |
|    | Ferm | 30.87 | 4.38E+05±1.0 <sup>a</sup>  | [M-H]- | 327.219 | 327.2181 |                                                |                     |
|    | G+F  | ND    | ND                         | [M-H]- | ND      | ND       |                                                |                     |

Results are expressed as mean ± SD of triplicate analyses. Different alphabetical letters in each column represent statistically significant differences (Tukey and Duncan test  $p \leq 0.05$ ) DW, dry weight sample

Table S5: Fatty acids detected in different processed brown rice samples (raw, germinated, fermented (*L.reuterii* AKT1), and germinated+ fermented (*L.reuterii* AKT1).

| S.No | Sample Name | Retention time | Peak Area                  | Adduct/ Charge     | Precursor mass | Found at mass | Formula finder result                          | Fatty acid         |
|------|-------------|----------------|----------------------------|--------------------|----------------|---------------|------------------------------------------------|--------------------|
| 1    | Raw         | 23.74          | 2.64E+04±1.02 <sup>a</sup> | [M-H]-             | 239.061        | 239.0597      | C <sub>8</sub> H <sub>16</sub> O <sub>2</sub>  | Octanoic acid      |
|      | Germ        | 30.93          | 3.72E+04±0.52 <sup>b</sup> | [M-H]-             | 239.061        | 239.0594      |                                                |                    |
|      | Ferm        | 31.29          | 4.92E+04±0.50 <sup>d</sup> | [M-H]-             | 239.061        | 239.0595      |                                                |                    |
|      | G+F         | 31.22          | 4.46E+04±1.01 <sup>c</sup> | [M-H]-             | 239.061        | 239.0594      |                                                |                    |
| 2    | Raw         | 28.79          | 6.01E+03±0.55 <sup>a</sup> | [M-H]-             | 255.234        | 255.2331      | C <sub>16</sub> H <sub>32</sub> O <sub>2</sub> | Palmitic Acid      |
|      | Germ        | 39.95          | 2.00E+05±1.01 <sup>c</sup> | [M-H]-             | 255.234        | 255.2332      |                                                |                    |
|      | Ferm        | 39.98          | 2.33E+05±0.50 <sup>d</sup> | [M-H]-             | 255.234        | 255.233       |                                                |                    |
|      | G+F         | 32.29          | 4.14E+03±0.50 <sup>b</sup> | [M-H]-             | 255.234        | 255.2331      |                                                |                    |
| 3    | Raw         | ND             | ND                         | [M+H] <sup>+</sup> | ND             | ND            | C <sub>5</sub> H <sub>10</sub> O <sub>2</sub>  | Valeric acid       |
|      | Germ        | ND             | ND                         | [M+H] <sup>+</sup> | ND             | ND            |                                                |                    |
|      | Ferm        | 22.88          | 1.88E+04±0.50 <sup>a</sup> | [M+H] <sup>+</sup> | 185.066        | 185.0663      |                                                |                    |
|      | G+F         | ND             | ND                         | [M+H] <sup>+</sup> | ND             | ND            |                                                |                    |
| 4    | Raw         | 46.24          | 5.29E+05±1.05 <sup>a</sup> | [M-H]-             | 279.234        | 279.2332      | C <sub>18</sub> H <sub>32</sub> O <sub>2</sub> | Linoleic Acid      |
|      | Germ        | 46.23          | 5.48E+05±1.0 <sup>b</sup>  | [M-H]-             | 279.234        | 279.2331      |                                                |                    |
|      | Ferm        | 46.25          | 5.86E+05±1.0 <sup>c</sup>  | [M-H]-             | 279.234        | 279.2336      |                                                |                    |
|      | G+F         | 46.25          | 6.68E+05±0.52 <sup>d</sup> | [M-H]-             | 279.234        | 279.2333      |                                                |                    |
| 5    | Raw         | 47.28          | 1.35E+06±1.0 <sup>a</sup>  | [M+H] <sup>+</sup> | 271.264        | 271.2637      | C <sub>17</sub> H <sub>34</sub> O <sub>2</sub> | Heptadecanoic acid |
|      | Germ        | 47.27          | 1.48E+06±0.50 <sup>c</sup> | [M+H] <sup>+</sup> | 271.264        | 271.2638      |                                                |                    |
|      | Ferm        | 47.29          | 1.56E+06±1.01 <sup>d</sup> | [M+H] <sup>+</sup> | 271.264        | 271.2637      |                                                |                    |
|      | G+F         | 47.27          | 1.45E+06±1.0 <sup>b</sup>  | [M+H] <sup>+</sup> | 271.264        | 271.2635      |                                                |                    |
| 6    | Raw         | 27.69          | 5.28E+03±1.04 <sup>a</sup> | [M-H]-             | 283.265        | 283.2644      | C <sub>18</sub> H <sub>36</sub> O <sub>2</sub> | Stearic acid       |
|      | Germ        | 28.19          | 6.67E+03±1.0 <sup>b</sup>  | [M-H]-             | 283.265        | 283.2644      |                                                |                    |
|      | Ferm        | 28.57          | 8.46E+03±0.40 <sup>d</sup> | [M-H]-             | 283.265        | 283.2643      |                                                |                    |
|      | G+F         | 27.79          | 6.78E+03±1.0 <sup>c</sup>  | [M-H]-             | 283.265        | 283.2644      |                                                |                    |
| 7    | Raw         | 39.15          | 5.15E+05±1.07 <sup>a</sup> | [M+H] <sup>+</sup> | 200.201        | 200.2015      | C <sub>12</sub> H <sub>24</sub> O <sub>2</sub> | Lauric acid        |
|      | Germ        | 39.16          | 5.17E+05±0.50 <sup>b</sup> | [M+H] <sup>+</sup> | 200.201        | 200.2015      |                                                |                    |
|      | Ferm        | 39.16          | 5.50E+05±0.50 <sup>d</sup> | [M+H] <sup>+</sup> | 200.201        | 200.2015      |                                                |                    |
|      | G+F         | 39.14          | 5.33E+05±0.51 <sup>c</sup> | [M+H] <sup>+</sup> | 200.201        | 200.2014      |                                                |                    |
| 8    | Raw         | 34.57          | 1.21E+04±0.52 <sup>a</sup> | [M-H]-             | 243.161        | 243.1605      | C <sub>13</sub> H <sub>24</sub> O <sub>4</sub> |                    |

|    |      |       |                            |                    |         |          |                                                |                                               |
|----|------|-------|----------------------------|--------------------|---------|----------|------------------------------------------------|-----------------------------------------------|
|    | Germ | 34.56 | 3.19E+05±0.51 <sup>c</sup> | [M-H]-             | 243.161 | 243.1605 |                                                | Tridecanedioic acid                           |
|    | Ferm | 34.59 | 3.21E+05±0.50 <sup>d</sup> | [M-H]-             | 243.161 | 243.1606 |                                                |                                               |
|    | G+F  | 34.58 | 2.96E+05±0.52 <sup>b</sup> | [M-H]-             | 243.161 | 243.1605 |                                                |                                               |
| 9  | Raw  | ND    | ND                         | [M+H] <sup>+</sup> | ND      | ND       | C <sub>12</sub> H <sub>20</sub> O <sub>3</sub> | Traumatol                                     |
|    | Germ | 32.83 | 6.34E+03±0.52 <sup>a</sup> | [M+H] <sup>+</sup> | 213.149 | 213.1488 |                                                |                                               |
|    | Ferm | 32.82 | 1.71E+06±0.6 <sup>c</sup>  | [M+H] <sup>+</sup> | 213.149 | 213.1491 |                                                |                                               |
|    | G+F  | 32.8  | 4.42E+05±0.55 <sup>b</sup> | [M+H] <sup>+</sup> | 213.149 | 213.1491 |                                                |                                               |
| 10 | Raw  | ND    | ND                         | [M-H]-             | ND      | ND       | C <sub>18</sub> H <sub>32</sub> O <sub>5</sub> | Octadecadienoic acid/<br>Corchorifatty acid F |
|    | Germ | ND    | ND                         | [M-H]-             | ND      | ND       |                                                |                                               |
|    | Ferm | 30.87 | 4.38E+05±0.51 <sup>a</sup> | [M-H]-             | 327.219 | 327.2181 |                                                |                                               |
|    | G+F  | ND    | ND                         | [M-H]-             | ND      | ND       |                                                |                                               |
| 11 | Raw  | ND    | ND                         | [M-H]-             | ND      | ND       | C <sub>18</sub> H <sub>34</sub> O <sub>3</sub> | Ricinoleic acid                               |
|    | Germ | ND    | ND                         | [M-H]-             | ND      | ND       |                                                |                                               |
|    | Ferm | 2.32  | 1.35E+03±0.51 <sup>a</sup> | [M-H]-             | 297.12  | 297.2425 |                                                |                                               |
|    | G+F  | ND    | ND                         | [M-H]-             | ND      | ND       |                                                |                                               |
| 12 | Raw  | ND    | ND                         | [M-H]-             | ND      | ND       | C <sub>6</sub> H <sub>12</sub> O <sub>4</sub>  | Mevalonic Acid                                |
|    | Germ | ND    | ND                         | [M-H]-             | ND      | ND       |                                                |                                               |
|    | Ferm | 3.48  | 2.72E+05±0.52 <sup>b</sup> | [M-H]-             | 147.067 | 147.0666 |                                                |                                               |
|    | G+F  | 3.49  | 1.19E+05±0.52 <sup>a</sup> | [M-H]-             | 147.067 | 147.0666 |                                                |                                               |
| 13 | Raw  | 22.59 | 9.99E+04±0.50 <sup>a</sup> | [M-H]-             | 187.099 | 187.0979 | C <sub>9</sub> H <sub>16</sub> O <sub>4</sub>  | Azelaic Acid                                  |
|    | Germ | 22.47 | 7.23E+04±0.50 <sup>b</sup> | [M-H]-             | 187.099 | 187.098  |                                                |                                               |
|    | Ferm | 22.51 | 6.28E+05±0.52 <sup>d</sup> | [M-H]-             | 187.099 | 187.0978 |                                                |                                               |
|    | G+F  | 22.51 | 4.78E+05±0.50 <sup>c</sup> | [M-H]-             | 187.099 | 187.0978 |                                                |                                               |
| 14 | Raw  | ND    | ND                         | [M-H]-             | ND      | ND       | C <sub>9</sub> H <sub>18</sub> O <sub>3</sub>  | 9-Hydroxynonanoic acid                        |
|    | Germ | ND    | ND                         | [M-H]-             | ND      | ND       |                                                |                                               |
|    | Ferm | 23.49 | 7.46E+04±0.51 <sup>b</sup> | [M-H]-             | 173.119 | 173.1186 |                                                |                                               |
|    | G+F  | 23.48 | 5.29E+04±1.0 <sup>a</sup>  | [M-H]-             | 173.119 | 173.1186 |                                                |                                               |
| 15 | Raw  | ND    | ND                         | [M-H]-             | ND      | ND       | C <sub>19</sub> H <sub>36</sub> O <sub>5</sub> | Bempedoic acid                                |
|    | Germ | ND    | ND                         | [M-H]-             | ND      | ND       |                                                |                                               |
|    | Ferm | 26    | 1.84E+05±0.50 <sup>a</sup> | [M-H]-             | 407.193 | 407.193  |                                                |                                               |
|    | G+F  | ND    | ND                         | [M-H]-             | ND      | ND       |                                                |                                               |
| 16 | Raw  | 39.06 | 1.45E+05±0.50 <sup>a</sup> | [M-H]-             | 313.24  | 313.2389 | C <sub>18</sub> H <sub>34</sub> O <sub>4</sub> |                                               |

|    |      |       |                            |        |         |          |                                                |                      |
|----|------|-------|----------------------------|--------|---------|----------|------------------------------------------------|----------------------|
| 17 | Germ | 39.05 | 2.69E+05±1.1 <sup>b</sup>  | [M-H]- | 313.24  | 313.2387 |                                                | Octadecanedioic acid |
|    | Ferm | 39.07 | 3.52E+05±0.50 <sup>c</sup> | [M-H]- | 313.24  | 313.2388 |                                                |                      |
|    | G+F  | 39.06 | 4.04E+05±0.50 <sup>d</sup> | [M-H]- | 313.24  | 313.2389 |                                                |                      |
|    | Raw  | ND    | ND                         | [M-H]- | ND      | ND       | C <sub>18</sub> H <sub>34</sub> O <sub>5</sub> | Pinellic acid        |
|    | Germ | 34.31 | 2.75E+04±0.52 <sup>a</sup> | [M-H]- | 329.234 | 329.2339 |                                                |                      |
|    | Ferm | 32.84 | 8.55E+06±0.5 <sup>c</sup>  | [M-H]- | 329.234 | 329.233  |                                                |                      |
|    | G+F  | 32.83 | 7.83E+06±1.0 <sup>b</sup>  | [M-H]- | 329.234 | 329.2331 |                                                |                      |

Results are expressed as mean ± SD of triplicate analyses. Different alphabetical letters in each column represent statistically significant differences (Tukey and Duncan test  $p \leq 0.05$ ) DW, dry weight sample

Figure S1: Germinated brown rice:

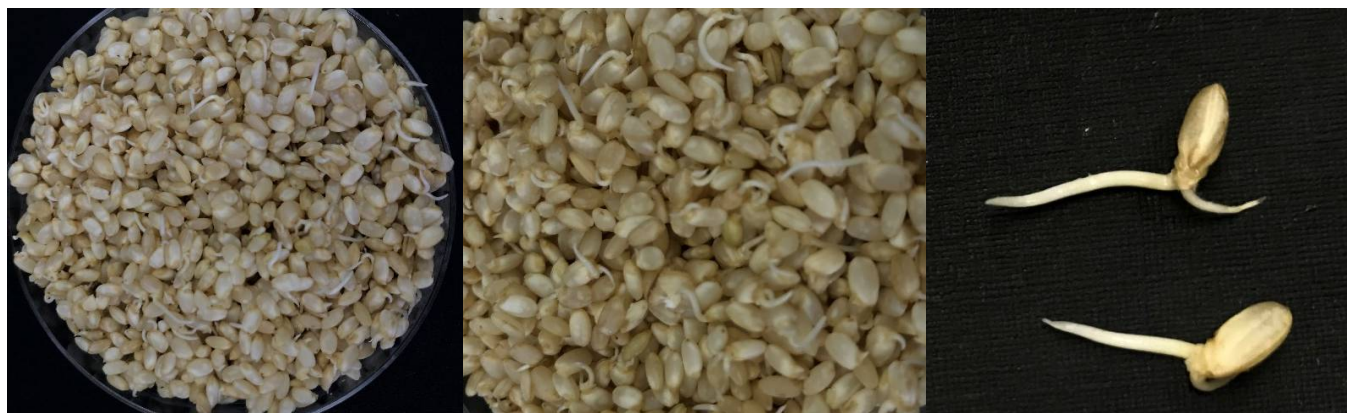

Figure S2: Principal component analysis (PCA) of Raw, Germ, Ferm (*L. reuteri* AKT1) and G+F were shown by comparing component 1(PC1) with component 2 (PC2)

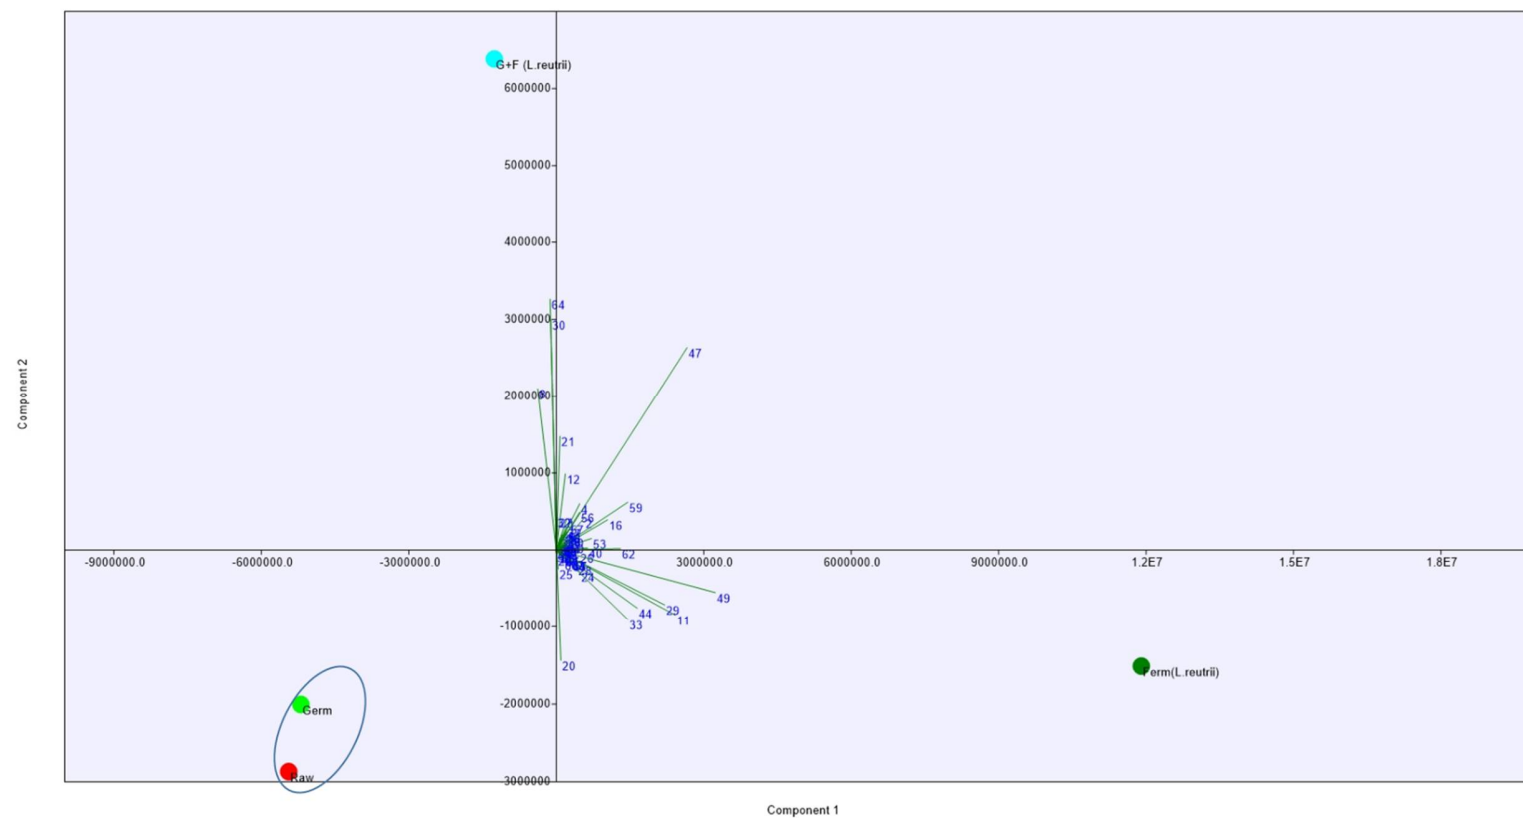

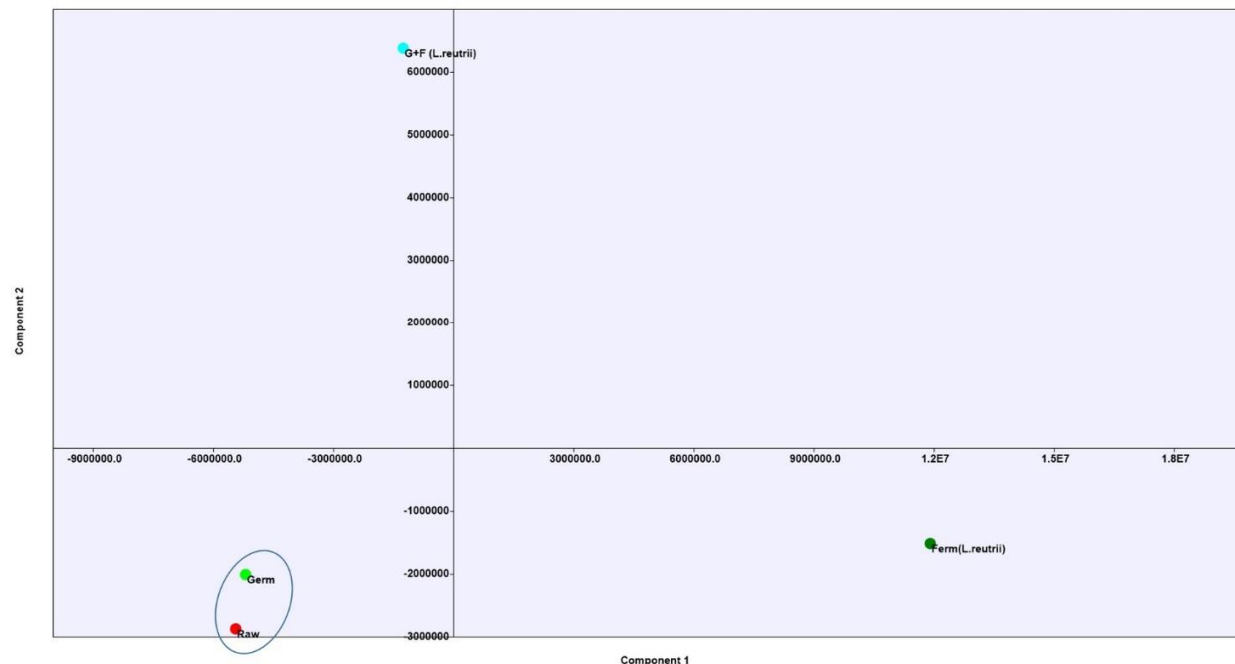

Figure S2 A). Identification of principal component analysis (PCA) of raw, germ, ferm (*L. reuterii*) and G+F were shown by comparing PC 1 with PC2 with Biplot. Where 1 to 68 number represents different bioactive compounds (amino acids, phenolic compounds, organic acids and fatty acids). B). Identification of principal component analysis (PCA) of raw, germ, ferm (*L. reuterii*) and G+F were shown by comparing PC 1 with PC2 without Biplot.

**Amino acid (1-18)**-(1-Histidine, 2-Lysine, 3-Methionine, 4-Glutamic acid, 5-arginine, 6-Valine, 7-Aspartic acid, 8-Phenylalanine, 9-Ornithine, 10-Serine, 11-Leucine, 12-Glutamine, 13-Tyrosine, 14-Threonine, 15-Asparagine, 16-Tryptophan, 17-Proline, 18-Gamma-aminobutyric acid)

**Phenolic compounds (19-32)**-(19- Eugenol, 20- 6-Gingerol, 21- Chrysin, 22- Coumarin, 23- Apigenin, 24- spermidine, 25- 6-Paradol, 26- Epigallocatechin, 27-p-Coumaric acid, 28-Cinnamic acid, 29-Methoxyphenylacetic, 30- 2-Hydroxybenzoic acid, 31- Vanillic acid, 32-  $\beta$ -carotenol)

**Fatty acid (33-49)**-(33- Octanoic acid, 34- Palmitic Acid, 35- Linoleic acid, 36 Heptadecanoic acid, 37- Stearic acid, 38- Lauric acid, 39- Tridecanedioic acid, 40- Traumatol, 41- Octadecadienoic acid/ Corchorifatty acid F, 42- Ricinoleic acid, 43- Mevalonic Acid, 44- Valeric acid, 45- Bempedoic acid, 46- Azelaic Acid, 47- Hydroxynonanoic Acid, 48- Octadecanedioic acid, 49- Pinellac acid)

**Organic acid (50-68)** (50- Malic acid, 51- Anofinic acid, 52- Lipoic Acid, 53- Itaconic acid, 54- Gluconic acid, 55- Succinic acid, 56- Malonic acid, 57- Arabinonic Acid, 58- Butanoic acid, 59- Neuraminic acid, 60- Isophthalic Acid, 61- Malyngic acid, 62- Glutaric acid, 63- Hydroxybutyric acid, 64- pyrazinoic acid, 65- Ascorbic acid, 66- Nicotinic acid, 67- p-Coumaric acid, 68- Homocitric acid)
